# Supplementary figures and images for: Neuroinflammation and M2 microglia: the good, the bad, and the inflamed
Source: Springer Nature journal article supplement (doi:10.1186/1742-2094-11-98), 2014-06-03

**A****Acute Stimuli**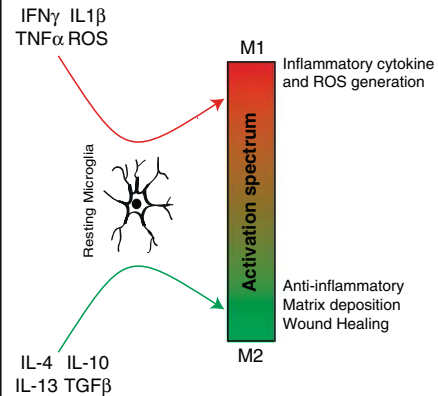**B****Chronic Inflammation**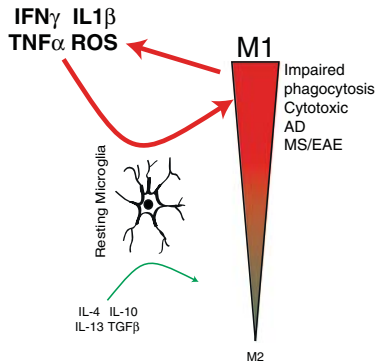**C****Therapeutics**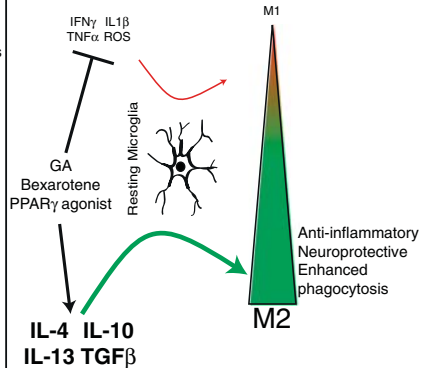

Supplement: 12974_2014_1012_MOESM1_ESM.pdf [file 12974_2014_1012_MOESM1_ESM.pdf]
